# Supplementary material
Source: Elsevier journal article supplement (https://www.sciencedirect.com/science/article/pii/S0210569115001175)
Supplement: mmc1 [file S0210569115001175:mmc1.pdf]

**Manuscrito para Medicina Intensiva**  
**Material complementario (Anexos)**

**Anexo 1.** Sumario de conclusiones de Foro de debate.

**A. Hierro endovenoso:**

- A1. Cuando **está correctamente prescrita** (indicación y dosis), los beneficios de la administración de FEV superan a los riesgos, siempre que se disponga de los medios necesarios para tratar una posible anafilaxia.
- A2. La corrección de la deficiencia perioperatoria de hierro puede lograrse más rápidamente con FEV que con la administración de hierro oral.
- A3. No hay contraindicación para la administración de FEV en anemia ferropénica asociada a enfermedades crónicas.
- A5. No obstante, es necesario realizar estudios amplios con un tamaño adecuado para valorar el posible efecto de la administración de FEV sobre de la incidencia de infecciones.

**B. Eritropoyetina recombinante humana:**

- B1. Hasta que no dispongamos de más datos de eficacia y seguridad, la rHuEPO sólo debe ser utilizada en las indicaciones aprobadas y/o siguiendo las recomendaciones de las directrices internacionales, como las que se recogen en DS 2013 o en la Guía ESA.
- B2. Se debe respetar los niveles de Hb a alcanzar en cada indicación y valorar la necesidad de tratamiento adyuvante con hierro, especialmente FEV, ya que mejora su eficacia y puede disminuir la dosis de rHuEPO y el riesgo de ETes.

**C. Ácido tranexámico:**

- C1. La eficacia del ATX para reducir la hemorragia y la necesidad de TSA, en cirugía cardíaca, obstetricia y ginecología, cirugía urológica, traumatismos y

cirugía urgente ha sido ampliamente demostrada, pero no en cirugía de trasplante hepático o hemorragia digestiva.

- C2. Sin embargo, su efecto sobre la mortalidad y ETEs perioperatorios en cirugía ortopédica no ha sido evaluado adecuadamente, y su administración solo debería realizarse tras obtener el consentimiento informado del paciente y respetando: 1) las restricciones que se hayan establecido ligadas a la prescripción y/o dispensación del medicamento, 2) los protocolos terapéutico-asistenciales de los centros sanitarios y 3) las recomendaciones que pueda dictar la AEMPS para la elaboración de dichos protocolos.

#### **D. Concentrados de factores de coagulación:**

- D1. Pendiente de la realización de estudios aleatorizados y controlados, los concentrados de factores de coagulación (CCP y CFBN) pueden considerarse fármacos seguros en el tratamiento del sangrado, aunque su administración se asocia a un incremento de la tasa de ETEs variando del 0,5 - 4%, más alta para los CCPs que para el CFBN.
- D2. No obstante, es concebible que el uso de algoritmos de manejo de la hemostasia dirigido por determinaciones *point-of-care* (tromboelastografía /tromboelastometría), para aclarar la causa de la coagulopatía perioperatoria y aportar los factores deficitarios de manera precoz y a las dosis adecuadas, mejorarían su efectividad y seguridad.

#### **E. Soluciones de hidroxietil almidón:**

- E1. Disponemos de una experiencia prolongada con la administración de las soluciones coloidales, tanto con gelatinas como con HEA de tercera generación para tratar de forma eficaz la hipovolemia en el paciente quirúrgico.
- E2. Parece razonable la utilización de coloides para restaurar la volemia en situaciones de hipovolemia aguda en las que la preservación de la perfusión orgánica es prioritaria.

- E3. La resolución del PRAC limitando su uso en pacientes con sepsis, críticos o quemados, ha generado una gran inseguridad en la prescripción de estos fármacos, y no disponemos datos de seguridad de las gelatinas en este tipo de pacientes.
- E4. Por el contrario, en pacientes quirúrgicos o con traumatismos sangrantes, el PRAC considera que la relación beneficio/riesgo del uso de HEA es positiva, aunque recomienda la realización de nuevos estudios de seguridad. Mientras tanto, una correcta indicación y dosificación serán primordiales para minimizar sus riesgos.

#### **F. Criterios restrictivos de transfusión**

- F1. En pacientes normovolémicos (médicos, quirúrgicos, críticos o trauma), la administración de CH con “criterios restrictivos”, y en la menor dosis clínicamente efectiva (uno puede ser suficiente), reduce los requerimientos de TSA en comparación al uso de “criterios permisivos o liberales”.
- F2. En este momento carecemos de datos suficientes para evaluar la aplicación de estos criterios en el paciente con sangrado activo o con síndrome coronario agudo.
- F3. Proponemos, no obstante, un cambio del paradigma de “uso restrictivo” al de “uso óptimo o adecuado”, administrando la cantidad mínima necesaria de TSA para revertir los síntomas clínicos y signos de hipoxia, o para alcanzar un nivel seguro mínimo de hemoglobina en función de las características clínicas de cada paciente en ese momento.
- F4. La transfusión de cada unidad de hematíes de ser una decisión clínica independiente, a la que debe seguir una reevaluación clínica y/o analítica.

**Anexo 2.** Tasa de efectos adversos tromboembólicos (ETEs) asociados con la administración de concentrados de factores, incluyendo la protrombina concentrados de complejo protrombínico (CCPs) y concentrados de fibrinógeno (CFBN), en estudios que incluyen un número considerable de pacientes.

| <i><b>Autor/año</b></i> | <i><b>Estudio</b></i>         | <i><b>Número de pacientes</b></i> | <i><b>Concentrado de factores</b></i> | <i><b>ETEs %</b></i> | <i><b>Comentarios</b></i>                                                                                                                                           |
|-------------------------|-------------------------------|-----------------------------------|---------------------------------------|----------------------|---------------------------------------------------------------------------------------------------------------------------------------------------------------------|
| Sorensen B 2011 (55)    | Revisión                      | 512                               | Various CCPs                          | 1.5                  | Analizan la incidencia de TEP, TVP, IAM. Existen diferencias importantes en el diseño de los estudios incluidos.                                                    |
| Gorlinger K 2011 (56)   | Retrospectivo                 | 3,865                             | CCPs + CFBN                           | 1.7                  | Analizan la incidencia de TEP, TVP, IAM. La incidencia de ETS fue más baja con CCP que con PFC (1.7 vs. 3.6 %, $p<.05$ ). Además, el uso de PCC fue coste-efectivo. |
| Carvalho MC 2012 (57)   | Restrospectivo, multicéntrico | 1,152                             | Octaplex CCPs                         | 0                    | Los parámetros de seguridad no eran objetivos específicamente definidos. El periodo de recogida de datos se limitó a las primeras 24h.                              |
| Desmetre T 2012 (58)    | Prospectivo, multicéntrico    | 825                               | Octaplex CCPs                         | 0.4                  | TVP e infarto cerebral. Se observó un amplia variabilidad intercentros. Los parámetros de seguridad no eran objetivos específicamente definidos.                    |
| Dentali F 2011 (59)     | Multicéntrico                 | 1,032                             | Varios CCPs                           | 1.8                  | Se observó un amplia variabilidad intercentros. Los parámetros de seguridad no eran objetivos específicamente definidos.                                            |
| Majeed A 2012 (60)      | Prospectivo                   | 160                               | Varios CCPs                           | 3.8                  | Único estudio específicamente diseñado para estudiar la incidencia de ETEs tras la admnistración de CCP para revertir la anticoagulación con warfarina.             |
| Leal-Noval SR 2013 (61) | Retrospectivo                 | 142                               | Prothromplex CCPs                     | 0                    | Se incluyó a pacientes con sin tratamiento con AVK.                                                                                                                 |

|                           |                             |                |                  |     |                                                                                                                                                                                                                   |
|---------------------------|-----------------------------|----------------|------------------|-----|-------------------------------------------------------------------------------------------------------------------------------------------------------------------------------------------------------------------|
| Sarode R<br>2013 (62)     | Aleatorizado,<br>controlado | 103 vs.<br>109 | Beriplex<br>CCPs | 3,9 | Las tasas de ETEs fueron del 3.9% para CCPs y del 2.8 % para el PFC (NS). Sin embargo, la incidencia de TRALI fue significativamente más alta en los pacientes que recibieron PFC                                 |
| Rahe-Mayer N<br>2013 (63) | Aleatorizado,<br>controlado | 29 vs.<br>32   | CFBN             | 0   | Cirugía aórtica. Aunque la dosis de CFBN administrada fue muy alta (100 mg/kg), solo se informó de un posible ETE, no relacionado con CFBN.                                                                       |
| Wikkelso A<br>2013 (64)   | Multicéntrico               | 248<br>6 RCTs  | CFBN             | 4.5 | Las tasas de ETEs fueron idénticas en los pacientes tratados y no tratados con CFBN (4.5 %). En este meta-análisis de la Cochrane, los autores concluyen que el CFBN no aumenta la tasas de ETEs perioperatorios. |

**TEP:** trombo-embolismo pulmonar; **TVP:** trombosis venosa profunda; **IAM:** infarto agudo de miocardio; **PFC:** plasma fresco congelado; **AVK:** antagonistas de la vitamina K; **TRALI;** daño pulmonar agudo relacionado con la transfusión.

### **Anexo 3. Recomendaciones sobre la reposición de la volemia con fluidos intravenosos.**

#### **A. Recomendaciones de la ESICM – 2012 (73)**

- Se recomienda no utilizar HEA con peso molecular  $\geq 200$  kDa o grado de sustitución  $> 0,4$  en pacientes con sepsis grave o riesgo de fracaso renal agudo y sugerimos no utilizar 6% HEA 130/0.4 o gelatina en estas poblaciones.
- Se recomienda no utilizar coloides en pacientes con TCE y no para administrar las gelatinas o HEA a donantes de órganos.
- No se aconseja para utilizar soluciones hiperoncóticas para la reposición de la volemia con fluidos.
- Se recomienda que cualquier nuevo coloide sólo debe introducirse en la práctica clínica después de que se establezcan los parámetros de seguridad relevantes para el paciente.

#### **B. Recomendaciones NICE 2013 (74)**

Si los pacientes necesitan reposición de la volemia mediante la administración IV de fluidos:

- Utilizar cristaloides que contengan sodio en el rango de 130-154 mmol/L, empezando por la administración de un bolo de 500 mL en menos de 15 minutos.
- No utilizar HEA para la reposición de la volemia con fluidos.
- Considerar el uso de solución de albúmina humana al 4-5% para la reposición volémica con fluidos en pacientes con sepsis grave.

#### **C. Recomendaciones ESA 2013 (22)**

- Sugerimos la reposición de las pérdidas extracelulares de líquido con cristaloides isotónicos en forma oportuna y guiada por un protocolo de administración. 2C
- Comparados con los cristaloides, la estabilización hemodinámica con coloides iso-oncóticos, como la albúmina humano o el hidroxietil almidón, provoca menos edema tisular. C
- Sugerimos el uso de soluciones equilibradas de cristaloides para la reposición de la volemia como un solvente básico para las preparaciones coloidales iso-oncóticas. 2C

## **Anexo 4. Recomendaciones sobre la transfusión de concentrado de hematíes**

### **A. Recomendaciones de la AABB (94)**

- Recomendación 1: La AABB recomienda adherirse a una estrategia de transfusión restrictiva (7 a 8 g/dL) en los pacientes hospitalizados, estables (GRADE 1A: recomendación fuerte; evidencia de alta calidad).
- Recomendación 2: La AABB sugiere adherirse a una estrategia restrictiva en pacientes hospitalizados con enfermedad cardiovascular preexistente y considerar la transfusión en pacientes con síntomas o una hemoglobina de 8 g/dL o menos (GRADE 2B: recomendación débil; evidencia de calidad moderada).
- Recomendación 3: La AABB no puede hacer una recomendación a favor o en contra del uso de un umbral de transfusión liberal o restrictivo para pacientes hospitalizados, hemodinámicamente estables con síndrome coronario agudo (GRADE 0: recomendación incierta; evidencia de muy baja calidad).
- Recomendación 4: La AABB sugiere que las decisiones de transfusión estén basadas en los síntomas, así como en la concentración de hemoglobina (GRADE 2C: recomendación débil; evidencia de baja calidad).

### **B. Recomendaciones del Update 2013 del Documento Sevilla (15)**

- Recomendación 1: En pacientes críticos, politraumatizados y/o quirúrgicos, sin afectación cardiológica y/o del Sistema Nervioso Central, recomendamos la transfusión de CH para mantener cifras de hemoglobina entre 7 y 9 g/dL, con objeto de disminuir la tasa transfusional (GRADE 1A).
- Recomendación 2: Pacientes críticos, politraumatizados y/o quirúrgicos, con afectación cardiológica y/o del Sistema Nervioso Central, recomendamos la transfusión de CH para mantener cifras de hemoglobina entre 8 y 10 g/dL, con objeto de disminuir la tasa transfusional (GRADE 1A).

## **Anexo 5.** Principales limitaciones de los estudios aleatorizados comparando dos umbrales de transfusión.

- 1) Elevado porcentaje de exclusión de pacientes (hasta el 80%, en algún estudio), lo que puede implicar un sesgo de selección.
- 2) Falta de un grupo de “práctica clínica habitual”, por lo que los resultados pueden estar fuertemente influidos por la presencia, en cada grupo del estudio, de subgrupos no comparables, con prácticas transfusionales diferentes y no adecuadas (e.g., los clínicos suelen utilizar umbrales de transfusión más altos en sujetos con cardiopatía isquémica que en sujetos más jóvenes y con menos comorbilidad).
- 3) Tamaño muestral muchas veces insuficiente para identificar riesgos de baja incidencia o aparición tardía (e.g., en cirugía ortopédica electiva, se estima que sería necesario realizar un ensayo que incluyera alrededor de 13.000 pacientes para detectar el impacto de dos estrategias transfusionales sobre la morbilidad, la mortalidad y el estado funcional).
- 4) No permitir una valoración adecuada de la incidencia de infra-transfusión y sus consecuencias.
- 5) No estar diseñados para discernir si algunos de los efectos adversos atribuidos a la TSA sean realmente secundarios a un almacenamiento prolongado de las unidades.
- 6) No permitir hacer recomendaciones de seguridad en el paciente con sangrado activo, ni en pacientes con síndrome coronario agudo.
